# Supplementary material for: A retrospective analysis of high sensitivity cardiac troponin-T ranges in non-myocardial infarction emergency department visits
Source: Springer Nature journal article supplement (doi:10.1186/s12872-021-02089-0), 2021-06-07
Supplement: MOESM1 [file 19235958]

A Retrospective Analysis of High Sensitivity Cardiac Troponin-T Ranges in Non-Myocardial  
Infarction Emergency Department Visits

Nathan Kong<sup>1</sup>, Rhys FM Chua<sup>2</sup>, Stephanie A Besser<sup>2</sup>, Louise Heelan<sup>3</sup>, Sandeep Nathan<sup>2</sup>,  
Thomas F. Spiegel<sup>4</sup>, Xander MR van Wijk<sup>5</sup>, Corey E Tabit<sup>2</sup>

## Supplemental

**sFigure 1.** Imprecision (% CV) at various levels of hs-cTnT during initial verification. Three patient pools are measured on two Roche Cobas e602 analyzers once per day for 20 days (40 points per pool). 10% CV is estimated at 11 ng/L cTnT.

**sTable 1.** The top 10 reasons for emergency department visits by number of encounters.

**sTable 2.** Baseline demographics by race, aggregated on the patient level. For repeated encounters, only the first patient encounter was used. Categorical variables expressed as count (percent). Normally distributed continuous variables expressed as mean (standard deviation), non-normally distributed continuous variables expressed as mean [inter-quartile range].

**sFigure 2.** Scatter plot of BMI and high sensitivity cardiac troponin T. Negative weak correlation.

**sFigure 3.** Scatter plot of age with only encounters where  $eGFR \geq 90 \text{ mL/min/1.73m}^2$

**sTable 3.** hs-cTnT values at the 25<sup>th</sup>, 50<sup>th</sup>, 75<sup>th</sup>, and 99<sup>th</sup> percentiles stratified by sex, race, age group, CKD stage, history of atrial fibrillation, history of heart failure without removing outliers. Results are aggregated at the encounter level.

**sTable 4.** hs-cTnT values at the 25<sup>th</sup>, 50<sup>th</sup>, 75<sup>th</sup>, and 99<sup>th</sup> percentiles stratified by multiple subgroups without outliers removed. Results are reported aggregated at the encounter level.

**Supplemental Figure 1.** Imprecision (% CV) at various levels of hs-cTnT during initial verification.

Three patient pools are measured on two Roche Cobas e602 analyzers once per day for 20 days (40 points per pool). 10% CV is estimated at 11 ng/L cTnT.

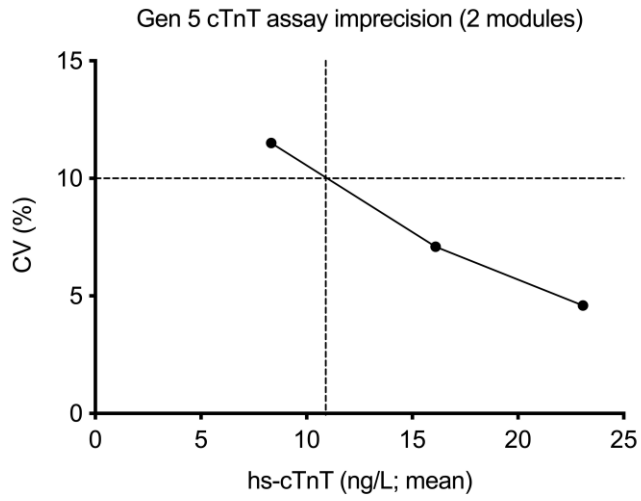

**Supplemental Table 1.** The top 10 reasons for emergency department visits by number of encounters

| <b>Reason for ED Visit</b> | <b>Number of Encounters</b> |
|----------------------------|-----------------------------|
| Chest pain                 | 1,766                       |
| Hypertension               | 908                         |
| Shortness of breath        | 859                         |
| Pain, not chest            | 784                         |
| Syncope, Near Syncope      | 378                         |
| Sepsis                     | 346                         |
| Headache                   | 150                         |
| Palpitations               | 117                         |
| Pulmonary embolism         | 112                         |
| Cough                      | 92                          |

**Supplemental Table 2.** Baseline demographics by white versus black race, aggregated on the patient level. For repeated encounters, only the first patient encounter was used. For this table only, all other races excluded. Categorical variables expressed as count (percent). Normally distributed continuous variables expressed as mean (standard deviation), non-normally distributed continuous variables expressed as mean [inter-quartile range].

|                                        | <b>White (n = 846)</b> | <b>Black (n = 6,789)</b> | <b>p-value</b> |
|----------------------------------------|------------------------|--------------------------|----------------|
| <b>Age (yrs)</b>                       | 62.1 (17.7)            | 57.5 (17.5)              | <0.001         |
| <b>Male</b>                            | 426 (50)               | 2648 (39)                | <0.001         |
| <b>BMI (kg/m<sup>2</sup>)</b>          | 26.0 [23.0, 30.0]      | 28.0 [24.0, 34.0]        | <0.001         |
| <b>eGFR (mL/min/1.73m<sup>2</sup>)</b> | 71.0 [51.0, 91.0]      | 65.0 [46.0, 83.0]        | <0.001         |
| <b>Systolic blood pressure (mmHg)</b>  | 130.0 [114.0, 147.0]   | 141.0 [123.0, 158.0]     | <0.001         |
| <b>Diastolic blood pressure (mmHg)</b> | 75.9 (17.5)            | 82.8 (19.0)              | <0.001         |
| <b>NT-proBNP (pg/mL)</b>               | 661.5 [148.8, 2502.5]  | 383.5 [83.0, 2469.5]     | 0.001          |
| <b>Sodium (mEq/L)</b>                  | 139.0 [136.0, 141.0]   | 140.0 [138.0, 142.0]     | <0.001         |
| <b>Hemoglobin (g/dL)</b>               | 12.7 [10.8, 14.2]      | 12.4 [10.9, 13.7]        | 0.002          |
| <b>Low-density Lipoprotein (mg/dL)</b> | 85.0 [64.5, 107.0]     | 80.0 [59.0, 110.0]       | 0.216          |
| <b>Total cholesterol (mg/dL)</b>       | 166.4 [138.5, 188.9]   | 154.8 [126.6, 191.2]     | 0.019          |
| <b>Diabetes mellitus</b>               | 163 (19)               | 1752 (26)                | <0.001         |
| <b>Hypertension</b>                    | 410 (48)               | 4047 (60)                | <0.001         |
| <b>Coronary Artery Disease</b>         | 149 (18)               | 902 (13)                 | 0.001          |
| <b>Heart failure</b>                   | 156 (18)               | 1432 (21)                | 0.08           |
| <b>Atrial fibrillation</b>             | 160 (19)               | 590 (9)                  | <0.001         |

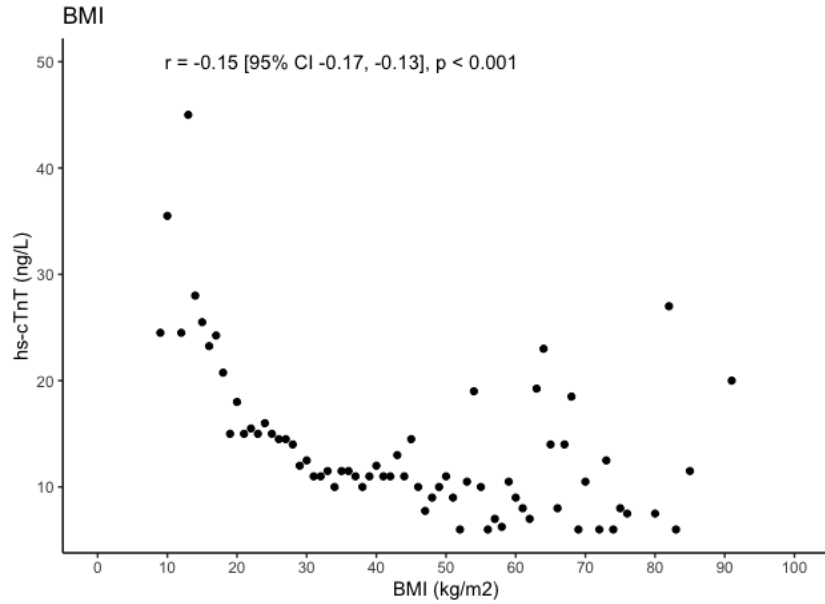

**Supplemental Figure 1.** Scatter plot of BMI and high sensitivity cardiac troponin T. Negative weak correlation.

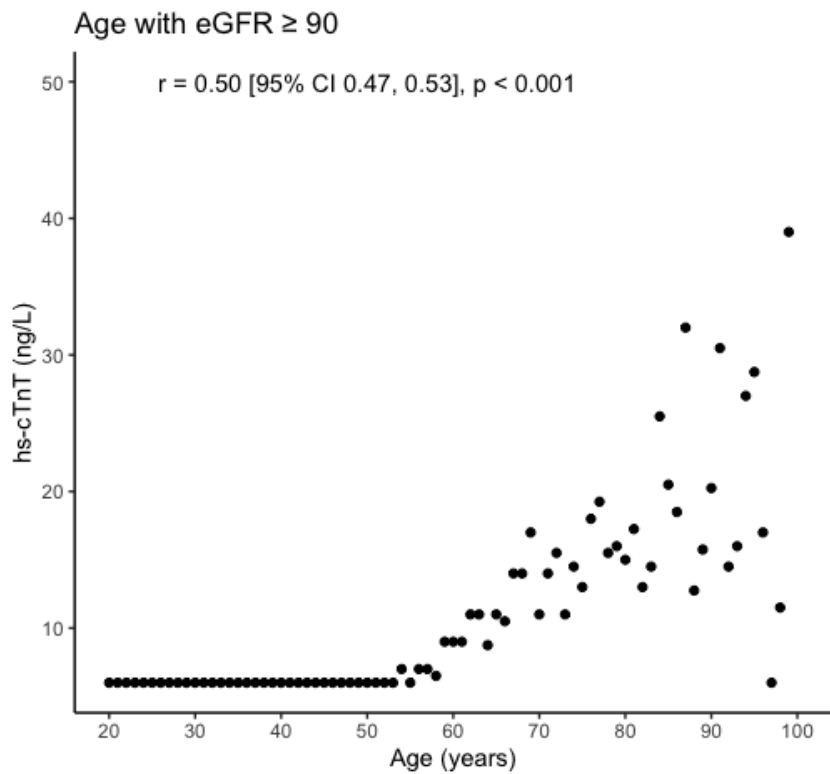

**Supplemental Figure 2.** Scatter plot of age with hs-cTnT with only encounters where  $eGFR \geq 90$  mL/min/1.73m<sup>2</sup>. Positive correlation. Each dot represents the median hs-cTnT value for all encounters with that age.

**Supplemental Table 3.** hs-cTnT values (in ng/L) at the 25<sup>th</sup>, 50<sup>th</sup>, 75<sup>th</sup>, and 99<sup>th</sup> percentiles stratified by sex, race, age group, CKD stage, history of atrial fibrillation, history of heart failure without removing outliers. Results are aggregated at the encounter level.

|                            | <i>n</i> | <i>25th %tile</i> | <i>50th %tile</i> | <i>75th %tile</i> | <i>99th %tile</i> |
|----------------------------|----------|-------------------|-------------------|-------------------|-------------------|
| <b>Gender</b>              |          |                   |                   |                   |                   |
| Female                     | 5751     | 6                 | 10                | 23                | 213               |
| Male                       | 3928     | 8                 | 17                | 39                | 347               |
| <b>Race</b>                |          |                   |                   |                   |                   |
| Black                      | 8348     | 6                 | 12                | 29                | 298               |
| White                      | 932      | 7                 | 17                | 34                | 189               |
| <b>Age Group</b>           |          |                   |                   |                   |                   |
| < 50                       | 2951     | 6                 | 6                 | 11                | 235               |
| 50 – 64                    | 3141     | 6                 | 12                | 26                | 318               |
| ≥ 65                       | 3587     | 12                | 22                | 43                | 267               |
| <b>CKD Stage</b>           |          |                   |                   |                   |                   |
| No CKD                     | 3391     | 6                 | 6                 | 12                | 85                |
| Stage 2                    | 3284     | 6                 | 11                | 20                | 143               |
| Stage 3                    | 1864     | 14                | 24                | 40                | 212               |
| Stage 4                    | 419      | 29                | 48                | 84                | 370               |
| Stage 5                    | 125      | 44                | 68                | 114               | 324               |
| ESRD                       | 596      | 65                | 104               | 168               | 779               |
| <b>Atrial Fibrillation</b> |          |                   |                   |                   |                   |
| No                         | 8611     | 6                 | 11                | 26                | 262               |
| Yes                        | 1068     | 17                | 30                | 59                | 356               |

---

**Heart Failure**

---

|     |      |    |    |    |     |
|-----|------|----|----|----|-----|
| No  | 7378 | 6  | 9  | 20 | 212 |
| Yes | 2301 | 16 | 31 | 64 | 465 |

---

%tile, percentile



**Supplemental Table 4.** hs-cTnT values (in ng/L) at the 25<sup>th</sup>, 50<sup>th</sup>, 75<sup>th</sup>, and 99<sup>th</sup> percentiles stratified by multiple subgroups without outliers removed. Results are reported aggregated at the encounter level.

| <i>Gender</i> | <i>Race</i> | <i>Age Group</i> | <i>eGFR</i> | <i>n</i> | <i>25th %tile</i> | <i>50th %tile</i> | <i>75th %tile</i> | <i>99th %tile</i> |
|---------------|-------------|------------------|-------------|----------|-------------------|-------------------|-------------------|-------------------|
| Female        | B           | < 50             | ≥ 90        | 1045     | 6                 | 6                 | 6                 | 36                |
|               |             |                  | 60 - 89     | 395      | 6                 | 6                 | 7                 | 70                |
|               |             |                  | < 60        | 212      | 12                | 30                | 87                | 433               |
| Female        | B           | 50 - 64          | ≥ 90        | 538      | 6                 | 6                 | 9                 | 36                |
|               |             |                  | 60 - 89     | 591      | 6                 | 7                 | 12                | 103               |
|               |             |                  | < 60        | 457      | 14                | 29                | 54                | 505               |
| Female        | B           | ≥ 65             | ≥ 90        | 260      | 8                 | 13                | 22                | 92                |
|               |             |                  | 60 - 89     | 696      | 8                 | 13                | 22                | 114               |
|               |             |                  | < 60        | 892      | 15                | 28                | 54                | 272               |
| Female        | W           | < 50             | ≥ 90        | 51       | 6                 | 6                 | 6                 | 78                |
|               |             |                  | 60 - 89     | 48       | 6                 | 6                 | 6                 | 62                |
|               |             |                  | < 60        | 17       | 7                 | 21                | 28                | 100               |
| Female        | W           | 50 - 64          | ≥ 90        | 17       | 6                 | 10                | 18                | 55                |
|               |             |                  | 60 - 89     | 55       | 6                 | 6                 | 14                | 58                |
|               |             |                  | < 60        | 31       | 10                | 19                | 32                | 134               |
| Female        | W           | ≥ 65             | ≥ 90        | 35       | 10                | 14                | 22                | 166               |
|               |             |                  | 60 - 89     | 98       | 9                 | 16                | 28                | 272               |
|               |             |                  | < 60        | 112      | 19                | 29                | 64                | 165               |
| Male          | B           | < 50             | ≥ 90        | 516      | 6                 | 6                 | 10                | 91                |
|               |             |                  | 60 - 89     | 248      | 6                 | 9                 | 17                | 166               |
|               |             |                  | < 60        | 163      | 36                | 74                | 154               | 741               |
| Male          | B           | 50 - 64          | ≥ 90        | 449      | 6                 | 10                | 17                | 91                |
|               |             |                  | 60 - 89     | 414      | 9                 | 14                | 24                | 214               |

|      |   |         |         |     |    |    |     |     |
|------|---|---------|---------|-----|----|----|-----|-----|
|      |   |         | < 60    | 352 | 22 | 50 | 100 | 588 |
| Male | B | ≥ 65    | ≥ 90    | 227 | 11 | 17 | 27  | 82  |
|      |   |         | 60 - 89 | 406 | 12 | 20 | 37  | 147 |
|      |   |         | < 60    | 487 | 28 | 50 | 99  | 452 |
| Male | W | < 50    | ≥ 90    | 50  | 6  | 6  | 9   | 93  |
|      |   |         | 60 - 89 | 33  | 6  | 8  | 19  | 148 |
|      |   |         | < 60    | 11  | 10 | 29 | 54  | 183 |
| Male | W | 50 - 64 | ≥ 90    | 32  | 9  | 14 | 20  | 403 |
|      |   |         | 60 - 89 | 60  | 8  | 14 | 22  | 71  |
|      |   |         | < 60    | 39  | 25 | 48 | 65  | 511 |
| Male | W | ≥ 65    | ≥ 90    | 53  | 13 | 21 | 37  | 208 |
|      |   |         | 60 - 89 | 79  | 12 | 20 | 29  | 98  |
|      |   |         | < 60    | 111 | 24 | 39 | 75  | 267 |

B, Black; W, White, %tile, percentile
